# Supplementary material for: A Mixture of Baicalein, Wogonin, and Oroxylin-A Inhibits EMT in the A549 Cell Line via the PI3K/AKT-TWIST1-Glycolysis Pathway
Source: PubMed Central journal article supplement (PMC8864075; doi:10.3389/fphar.2021.821485), 2022-02-09

## Supplementary Material

### 1. Western Blot pictures\_ AKT:

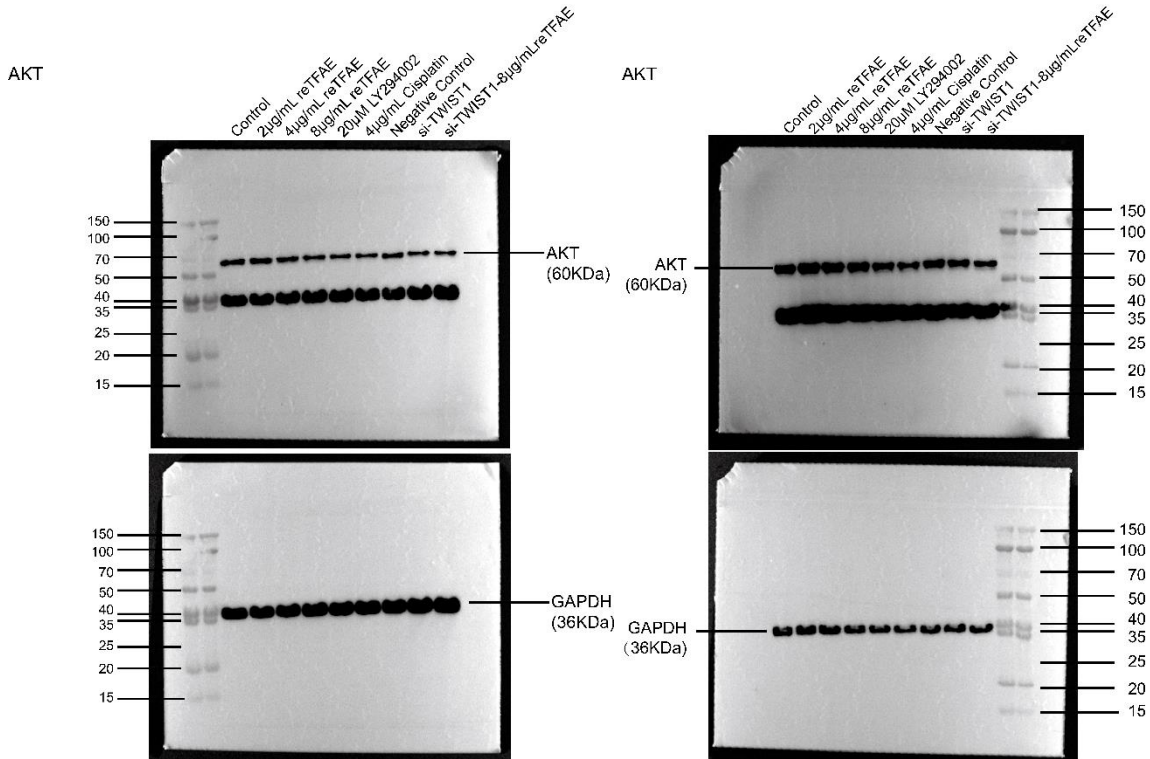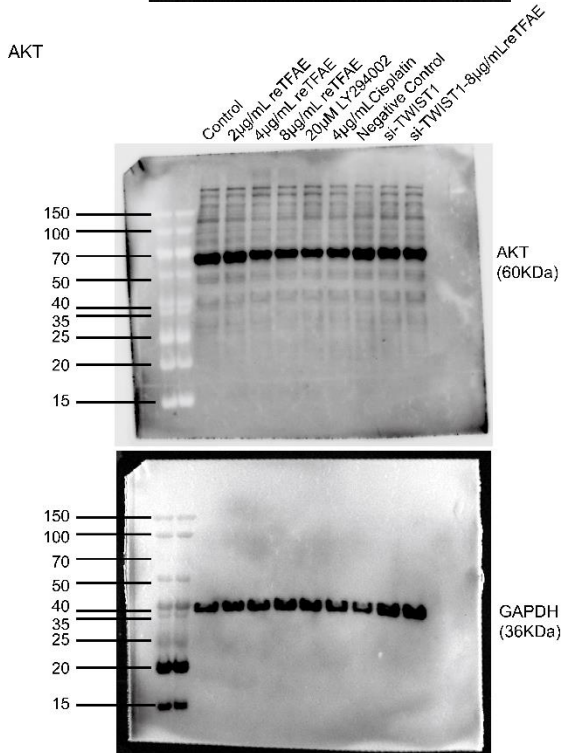

2. Western Blot pictures\_ p-AKT:

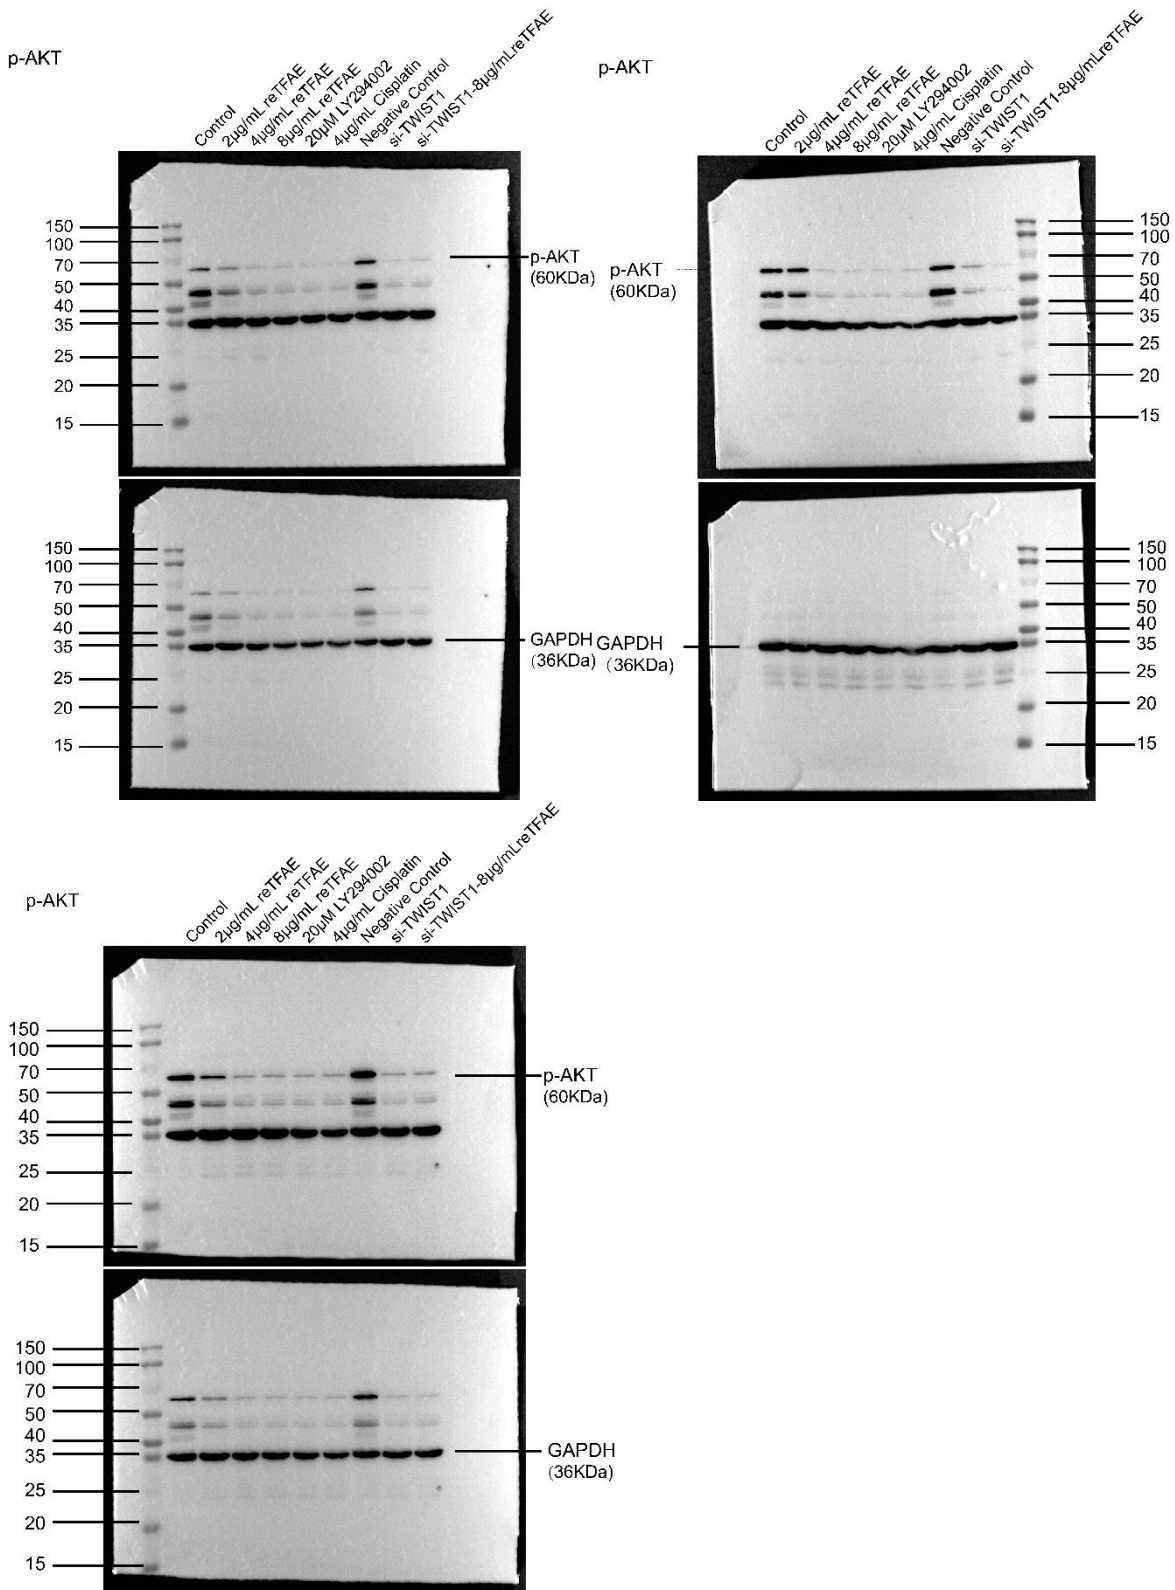

### 3. Western Blot pictures\_ E-Cadherin:

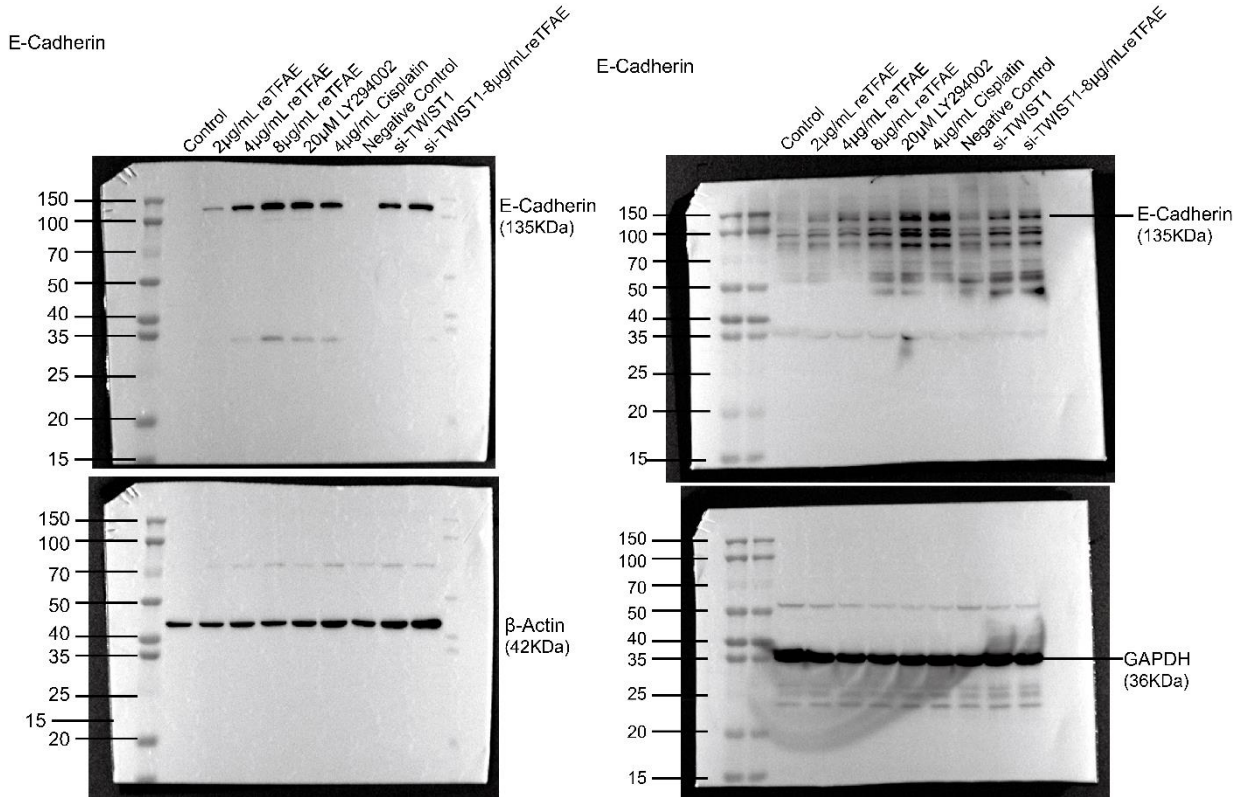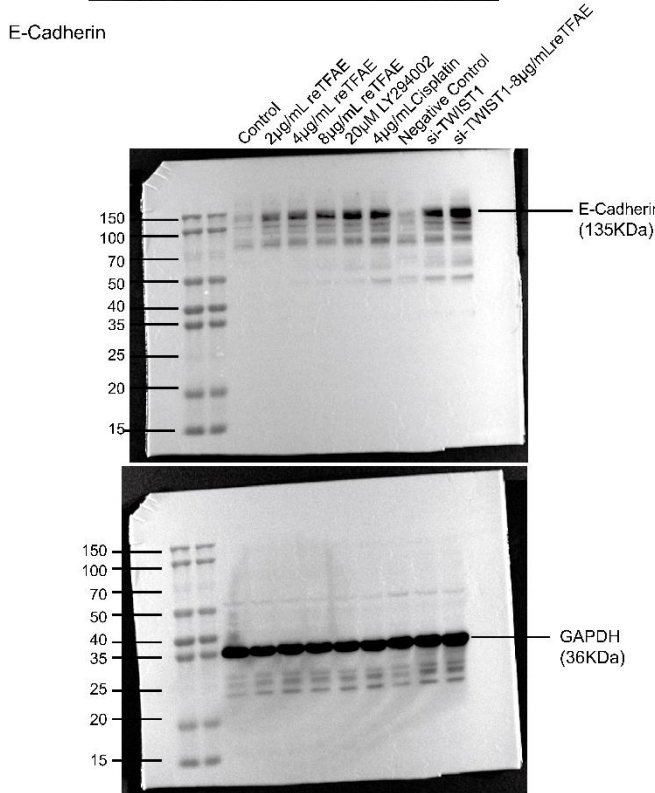

4. Western Blot pictures\_ N-Cadherin:

N-Cadherin

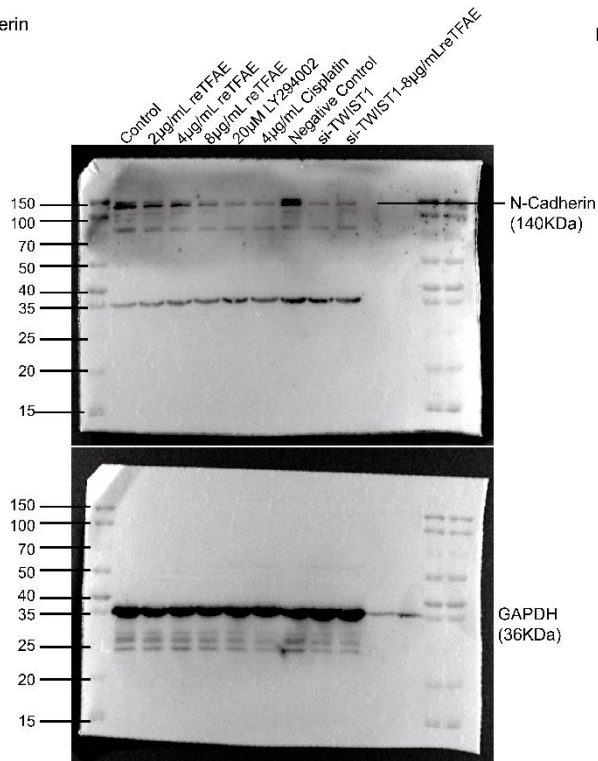

N-Cadherin

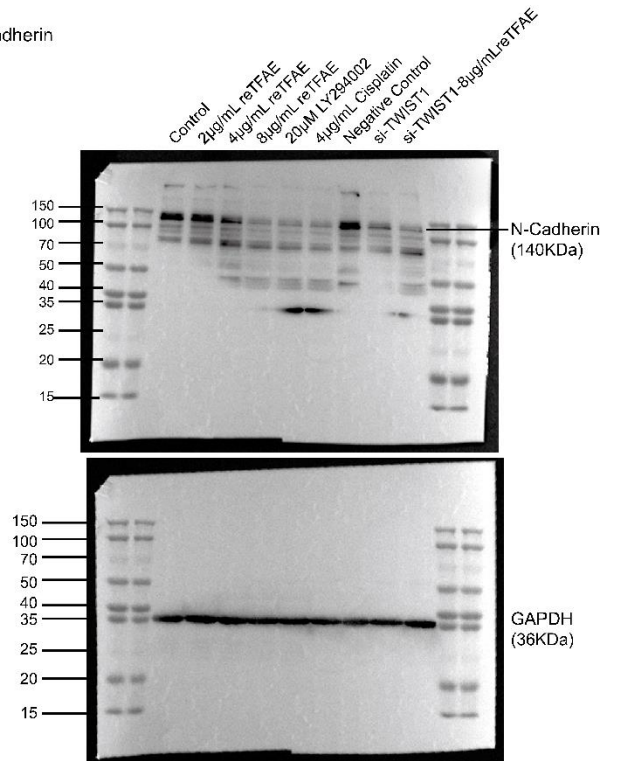

N-Cadherin

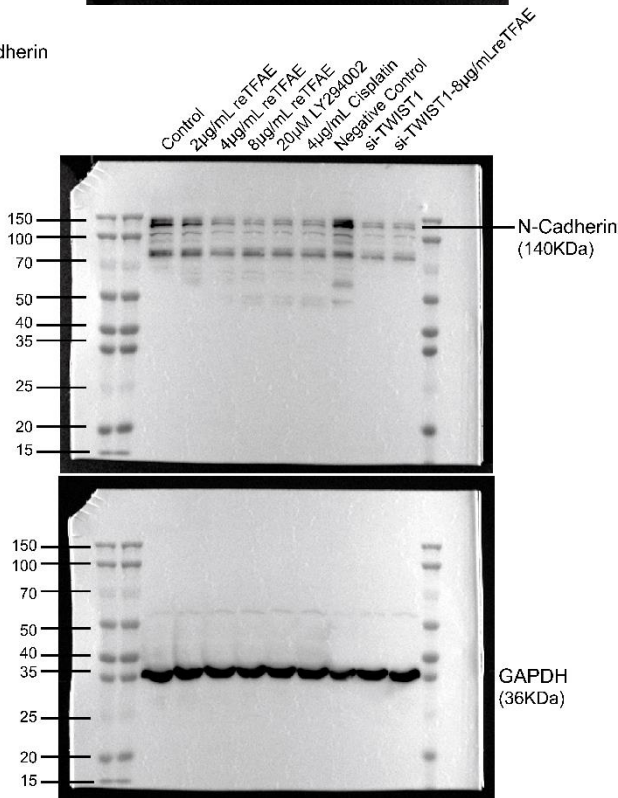

## 5. Western Blot pictures\_ Vimentin:

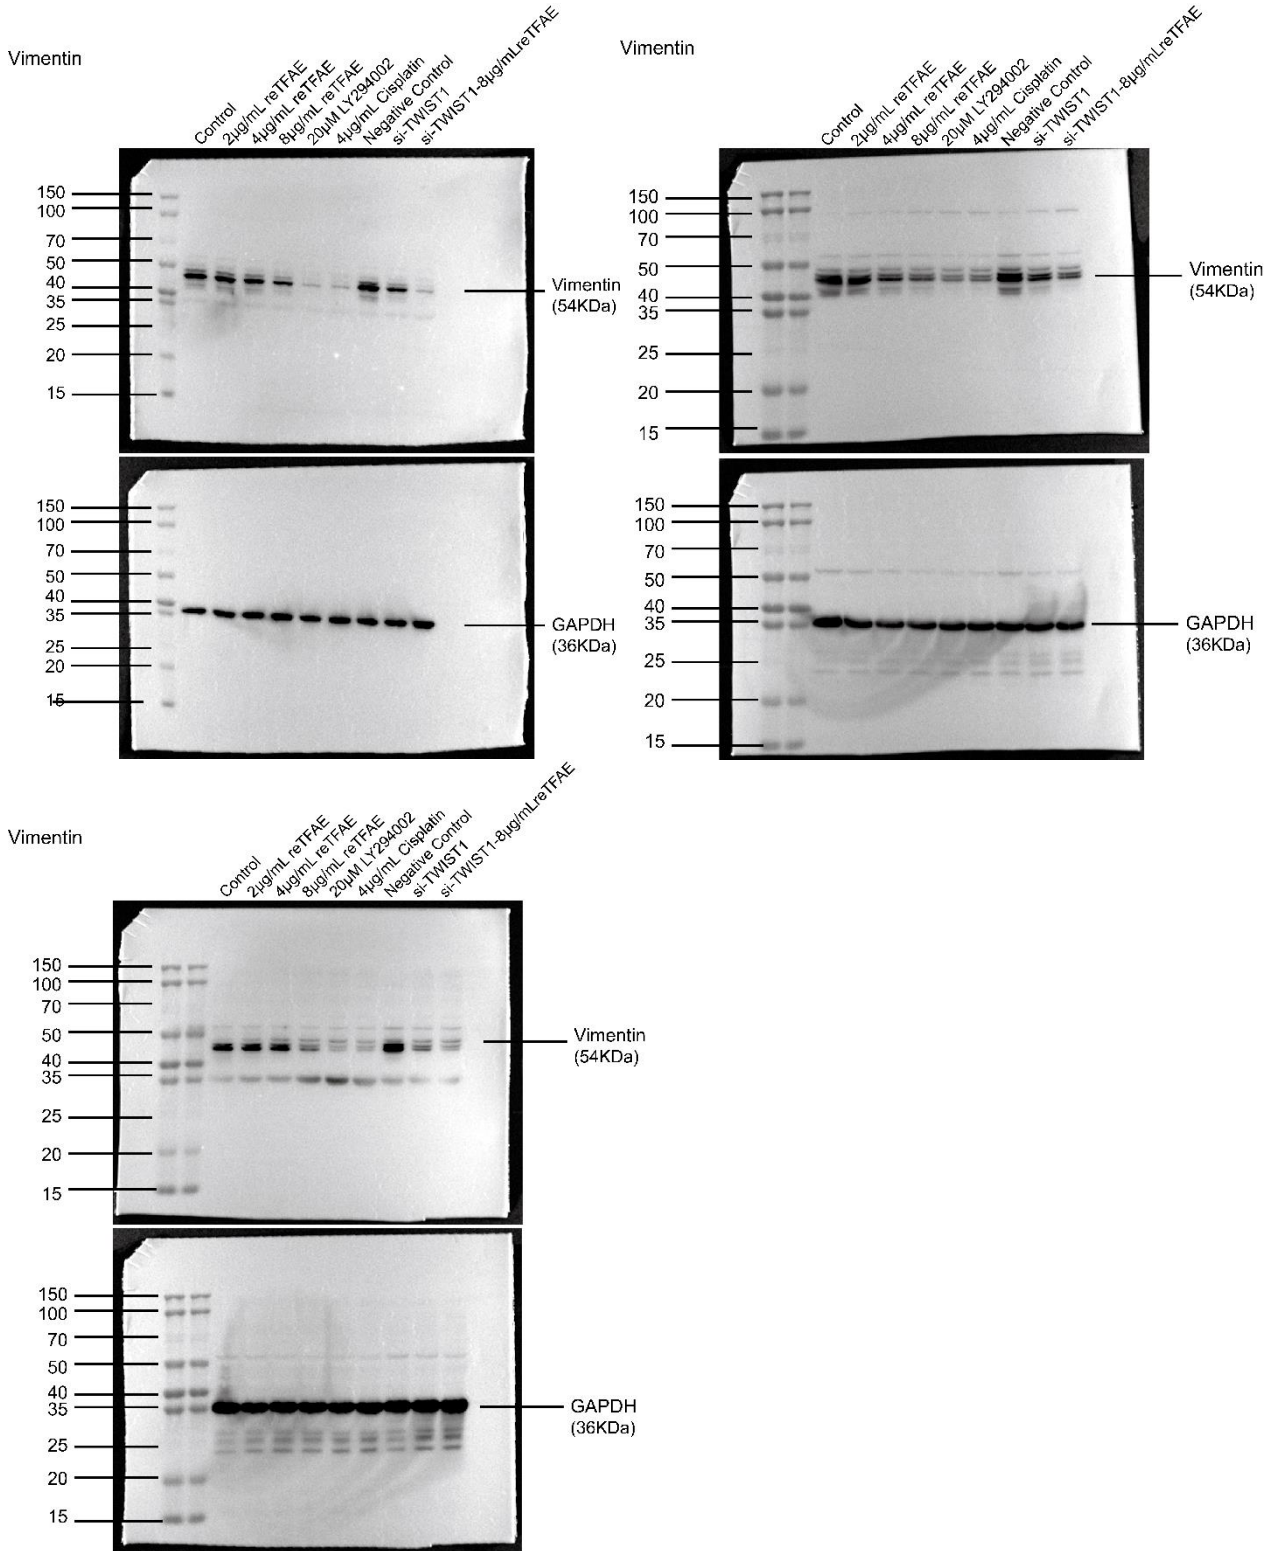

6. Western Blot pictures\_ TWIST1:

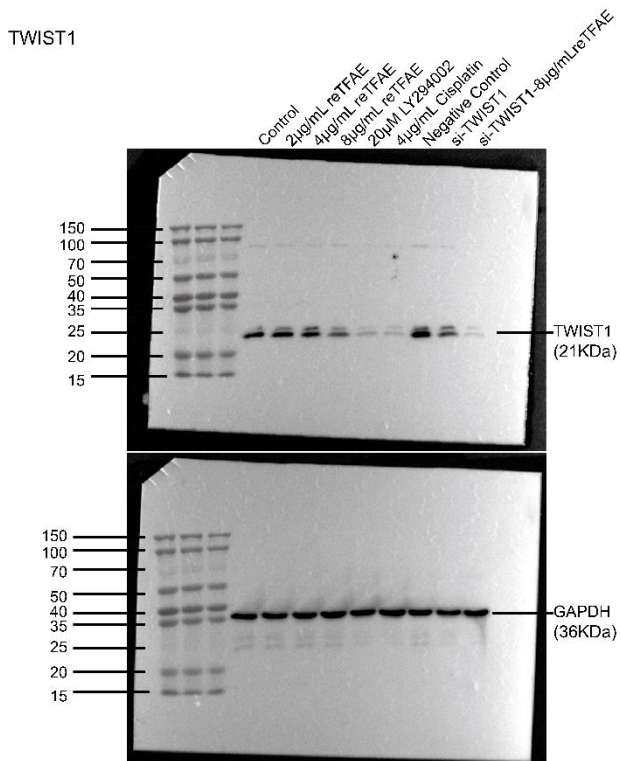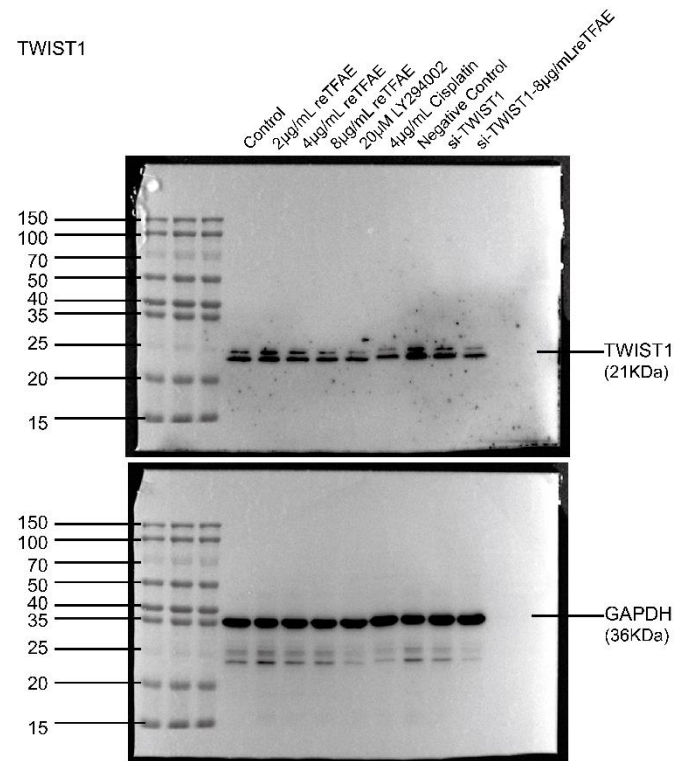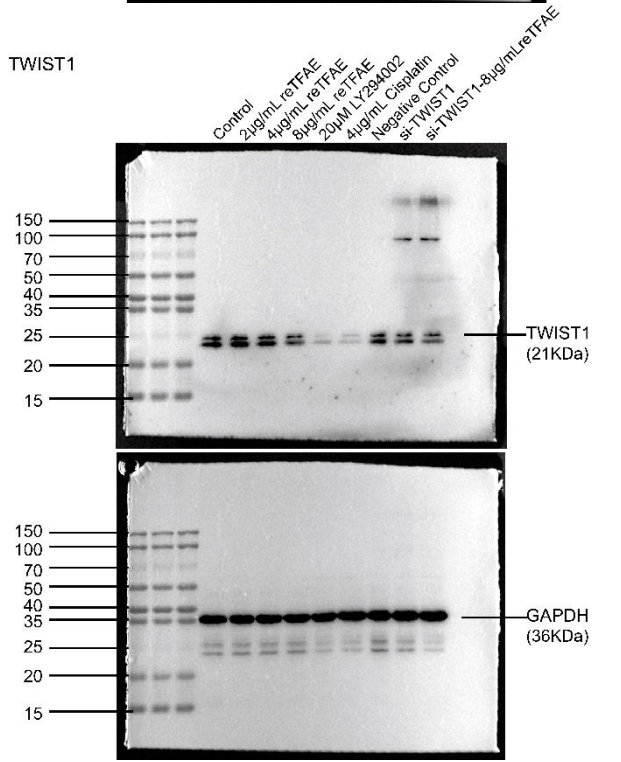

## 7. The effect of reTFAE on the viability of Beas-2B cells.

Beas-2B cells were obtained from the National Collection of Authenticated Cell Culture, and were cultured at 37°C under 5% CO<sub>2</sub> in Dulbecco's modified Eagle's medium (DMEM; Sigma, D6429) supplemented with 10% (vol./vol.) fetal bovine serum (FBS; Gibco, 10270-106), and 1% (vol./vol.) penicillin-streptomycin (PS; Gibco, 15140-122). Culture medium was refreshed and the cells were passaged when the confluency was 80%.

5\*10<sup>3</sup> cells were plated in 96-well plates with 100 µL regular medium per well. After adherence, switch to medium without FBS while containing reTFAE or DMSO (as 0 µg/mL) for another 24 hours. After the treatment, remove the medium, and 60 µL of CCK-8 reagent (AbMole BioScience) prepared with serum-free medium was added to each well containing 1/11 original concentration of CCK-8. Incubate at 37°C within 4 hours, and measure the absorbance at 450 nm by a microplate reader. And the IC<sub>50</sub> was 17.89 µg/mL (n=6).

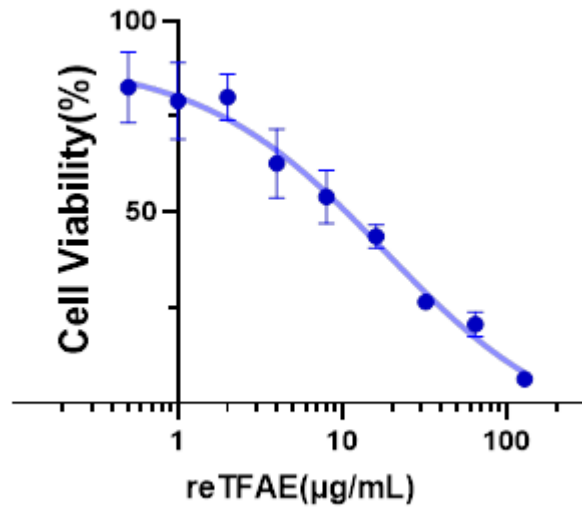

Supplement: DataSheet1.pdf [file DataSheet1.pdf]
